# Supplementary material for: Synergistic enhancement of the near-infrared luminescence properties of Ni2+-doped SrTiO3 perovskite phosphors and their application
Source: Royal Society of Chemistry journal article supplement (doi:10.1039/d3tc01786a), 2023-01-01
Supplement: d3tc01786a1.pdf [file d3tc01786a1.pdf]

**Synergistic Enhancement of Near-infrared Luminescence Properties of Ni<sup>2+</sup>-  
doped SrTiO<sub>3</sub> Perovskite Phosphors and Its Application**

Fengmei Zhu<sup>1</sup>, Yuan Gao<sup>1,2\*</sup>, Junjie Ding<sup>1</sup>, Jianbei Qiu<sup>1,2\*</sup>

<sup>1</sup>*Faculty of Material Science and Engineering, Kunming University of Science and  
Technology, Kunming 650093, China*

<sup>2</sup>*Key Lab. of Advanced Materials of Yunnan Province, Kunming 650093, China*

**Corresponding Author**

\*E-mail: Yuan Gao (1251719335@qq.com); Jianbei Qiu (qiu@kust.edu.cn).

**Table S1.** Crystallographic parameters obtained from XRD Rietveld refinement of STO, STO-Ni, STO-Ni-M (M=La<sup>3+</sup>, Gd<sup>3+</sup>, Nd<sup>3+</sup>, and Yb<sup>3+</sup>), respectively.

|                   | STO          | STO-Ni       | STO-Ni-La    | STO-Ni-Gd    | STO-Ni-Nd    | STO-Ni-Yb    |
|-------------------|--------------|--------------|--------------|--------------|--------------|--------------|
| Crystal structure | Cubic        | Cubic        | Cubic        | Cubic        | Cubic        | Cubic        |
| Space group       | <i>Fm-3m</i> | <i>Fm-3m</i> | <i>Fm-3m</i> | <i>Fm-3m</i> | <i>Fm-3m</i> | <i>Fm-3m</i> |
| a, Å              | 3.9015       | 3.9032       | 3.9013       | 3.9007       | 3.9008       | 3.8992       |
| V, Å <sup>3</sup> | 59.39        | 59.46        | 59.37        | 59.35        | 59.35        | 59.28        |
| R <sub>p</sub> %  | 4.15         | 5.73         | 5.74         | 4.99         | 6.27         | 5.11         |
| R <sub>wp</sub> % | 4.13         | 5.94         | 5.71         | 7.43         | 6.81         | 5.32         |
| χ <sup>2</sup> %  | 2.33         | 2.17         | 2.89         | 2.90         | 2.51         | 2.35         |

**Table S2.** Crystallographic parameters obtained from XRD Rietveld refinement of STO-Ni-xYb (x=0.0025, 0.005, 0.0075, 0.01, 0.015, and 0.02), respectively.

|                          | STO-Ni-<br>0.0025Yb | STO-Ni-<br>0.005Yb | STO-Ni-<br>0.0075Yb | STO-Ni-<br>0.01Yb | STO-Ni-<br>0.015Yb | STO-Ni-<br>0.02Yb |
|--------------------------|---------------------|--------------------|---------------------|-------------------|--------------------|-------------------|
| Crystal structure        | Cubic               | Cubic              | Cubic               | Cubic             | Cubic              | Cubic             |
| Space group              | <i>Fm-3m</i>        | <i>Fm-3m</i>       | <i>Fm-3m</i>        | <i>Fm-3m</i>      | <i>Fm-3m</i>       | <i>Fm-3m</i>      |
| a, Å                     | 3.9072              | 3.9019             | 3.8941              | 3.8916            | 3.8847             | 3.8755            |
| V, Å <sup>3</sup>        | 59.64               | 59.40              | 59.05               | 58.93             | 58.62              | 58.21             |
| R <sub>p</sub> %         | 5.44                | 7.63               | 4.98                | 5.39              | 7.07               | 6.51              |
| R <sub>wp</sub> %        | 5.44                | 4.84               | 8.75                | 6.13              | 5.81               | 6.90              |
| χ <sup>2</sup> %         | 2.47                | 2.66               | 2.97                | 3.05              | 2.85               | 2.16              |
| Average length (Ti-O, Å) | 1.9487              | 1.9492             | 1.9501              | 1.9505            | 1.9521             | 1.9528            |

**Table S3.** Crystallographic parameters obtained from XRD Rietveld refinement of STO-Ni-Yb-xTa (x=0.0025, 0.005, 0.0075, 0.01, 0.015, and 0.02), respectively.

|                          | STO-Ni-<br>Yb-<br>0.0025Ta | STO-Ni-<br>Yb-<br>0.005Ta | STO-Ni-<br>Yb-<br>0.0075Ta | STO-Ni-<br>Yb-0.01Ta | STO-Ni-<br>Yb-<br>0.015Ta | STO-Ni-<br>Yb-0.02Ta |
|--------------------------|----------------------------|---------------------------|----------------------------|----------------------|---------------------------|----------------------|
| Crystal structure        | Cubic                      | Cubic                     | Cubic                      | Cubic                | Cubic                     | Cubic                |
| Space group              | <i>Fm-3m</i>               | <i>Fm-3m</i>              | <i>Fm-3m</i>               | <i>Fm-3m</i>         | <i>Fm-3m</i>              | <i>Fm-3m</i>         |
| R <sub>p</sub> %         | 5.44                       | 7.63                      | 4.98                       | 5.39                 | 7.07                      | 6.51                 |
| R <sub>wp</sub> %        | 5.44                       | 4.84                      | 8.75                       | 6.13                 | 5.81                      | 6.90                 |
| χ <sup>2</sup> %         | 2.47                       | 2.66                      | 2.97                       | 3.05                 | 2.85                      | 2.16                 |
| Average length (Ti-O, Å) | 1.9486                     | 1.9479                    | 1.9471                     | 1.9461               | 1.9452                    | 1.9443               |
| Distortion index         | 1.0642                     | 1.0598                    | 1.0426                     | 1.029                | 1.0375                    | 1.0847               |

**Table S4.** XRF results of the STO-Ni, STO-Ni-Yb and STO-Ni-Yb-Ta phosphors, respectively.

|       | STO     | STO-Ni-Yb | STO-Ni-Yb-Ta |
|-------|---------|-----------|--------------|
| O,%   | 10.0486 | 13.5466   | 14.7463      |
| Ti,%  | 24.9303 | 23.6434   | 21.9117      |
| Sr,%  | 54.883  | 51.9832   | 48.2459      |
| Ni,%  | 0.403   | 0.4257    | 0.4803       |
| Yb,%  |         | 1.7895    | 1.1837       |
| Ta,%  |         |           | 1.9746       |
| Sum,% | 90.2649 | 91.3884   | 88.5425      |

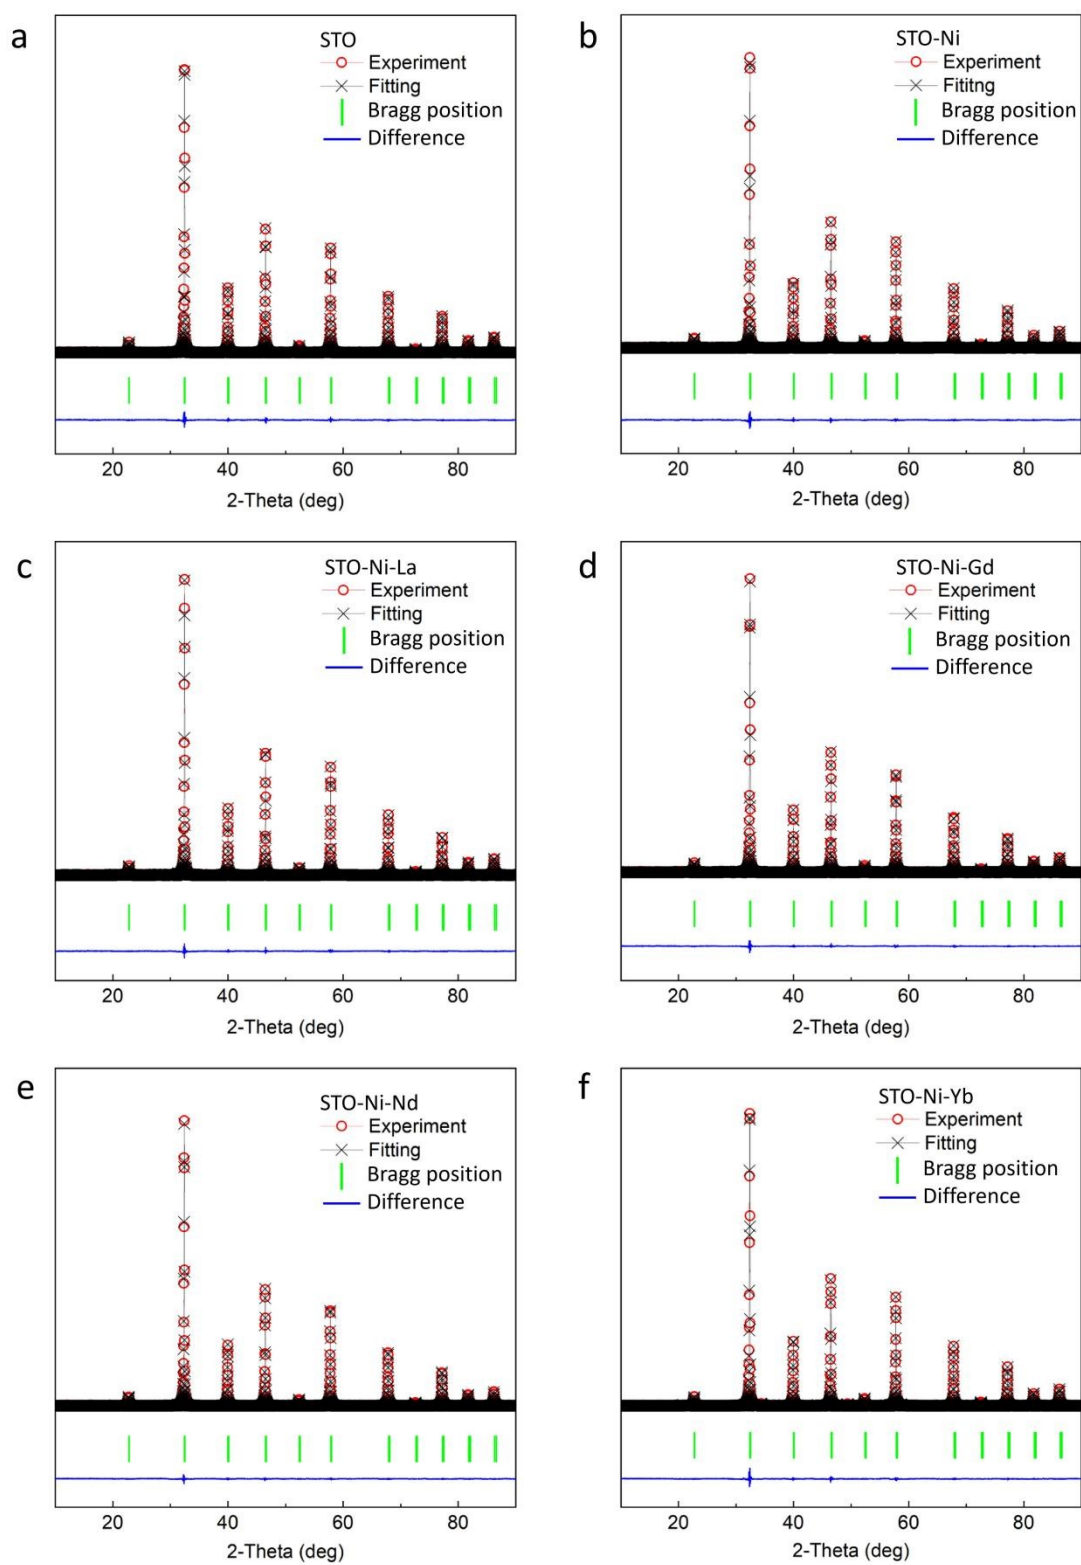

**Figure S1.** Rietveld refinement profiles of (a) STO, (b) STO-Ni, (c) STO-Ni-La, (d) STO-Ni-Gd, (e) STO-Ni-Nd, and (f) STO-Ni-Yb, respectively.

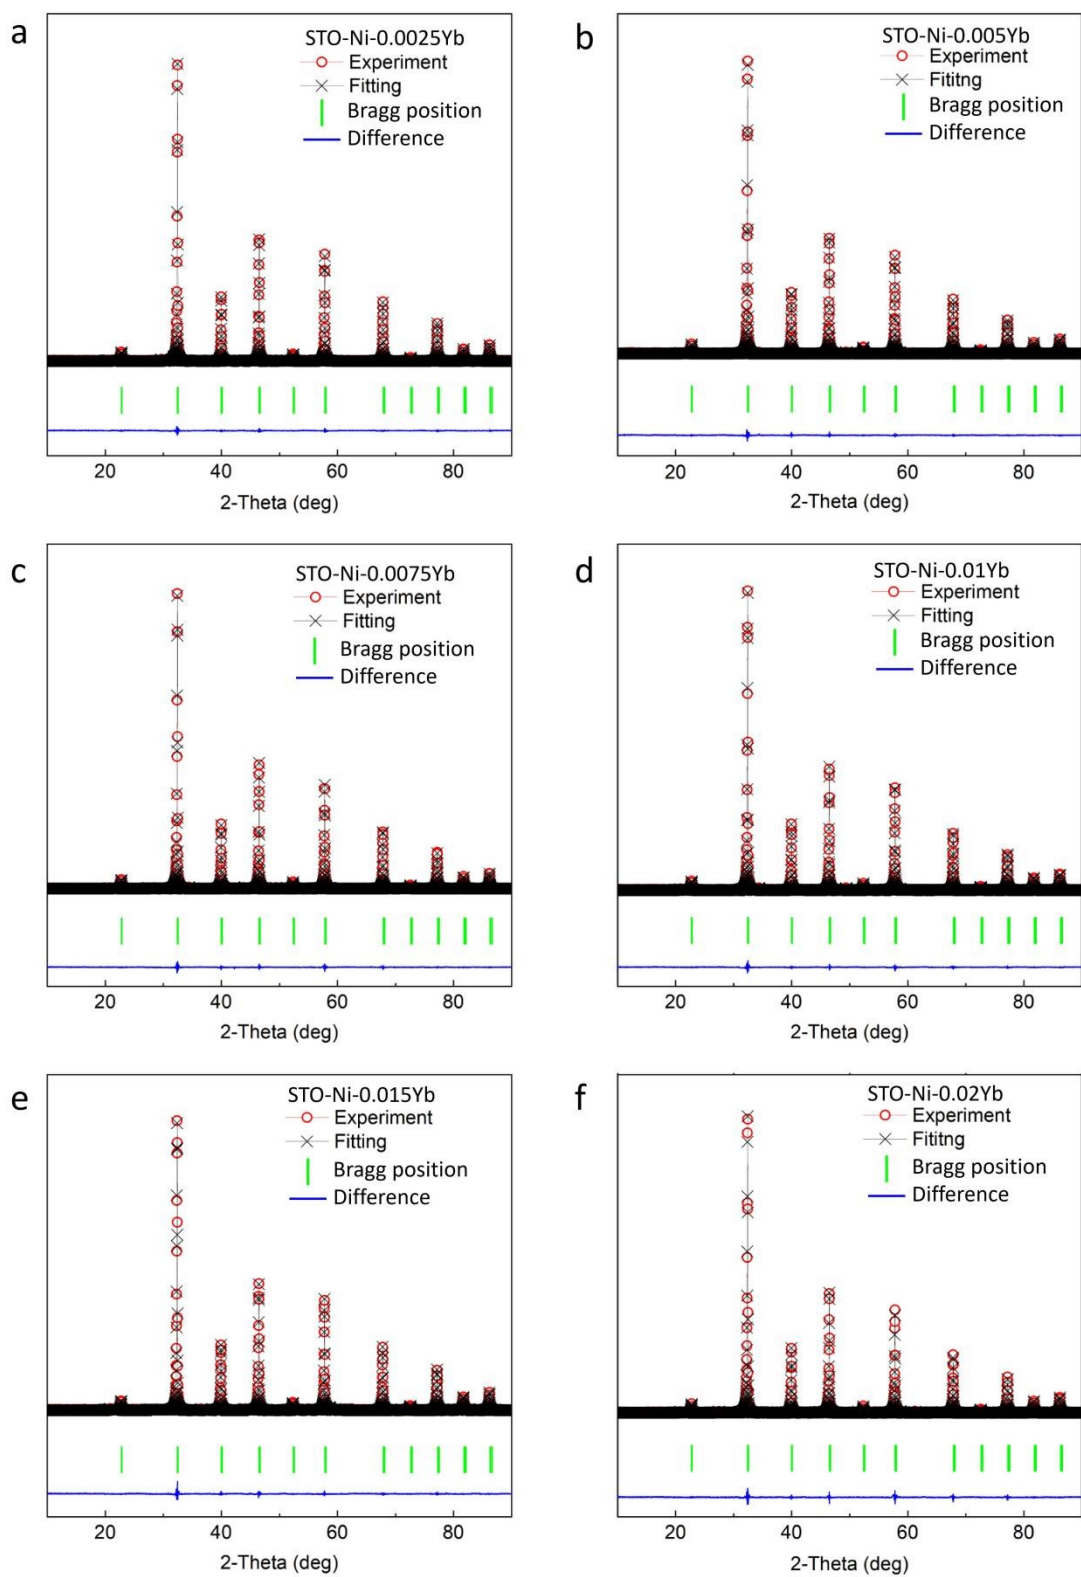

**Figure S2.** Rietveld refinement profiles of (a) STO-Ni-0.0025Yb, (b) STO-Ni-

0.005Yb, (c) STO-Ni-0.0075Yb, (d) STO-Ni-0.01Yb, (e) STO-Ni-0.015Yb, (f) STO-Ni-0.02Yb, respectively.

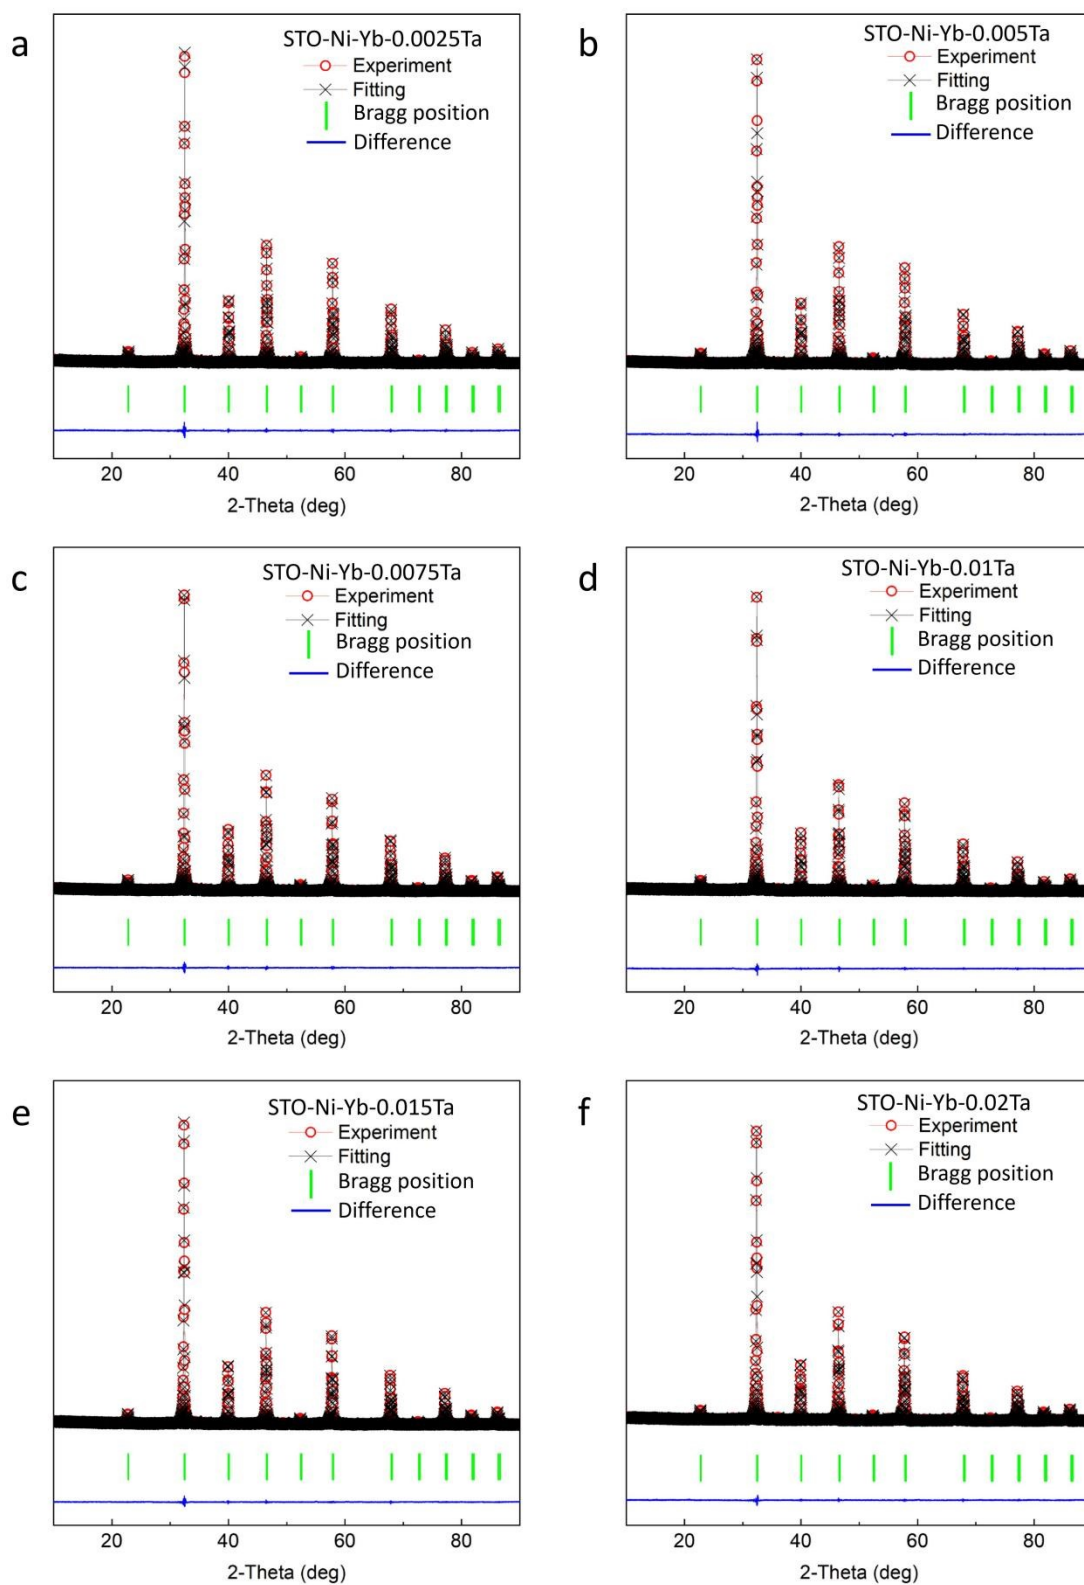

**Figure S3.** Rietveld refinement profiles of (a) STO-Ni-Yb-0.0025Ta, (b) STO-Ni-Yb-



0.005Ta, (c) STO-Ni-Yb-0.0075Ta, (d) STO-Ni-Yb-0.01Ta, (e) STO-Ni-Yb-0.015Ta, and (f) STO-Ni-Yb-0.02Ta, respectively.

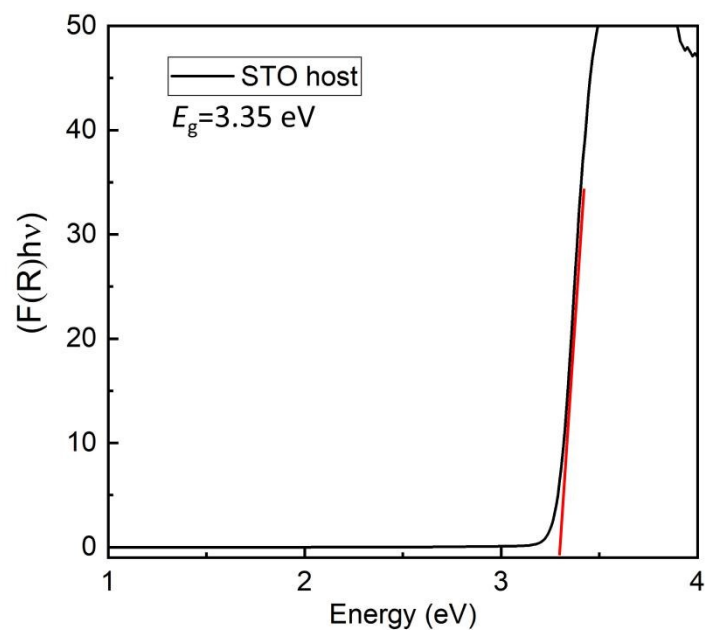

**Figure S4.** The plot of absorption coefficient against photon energy using SrTiO<sub>3</sub> host.

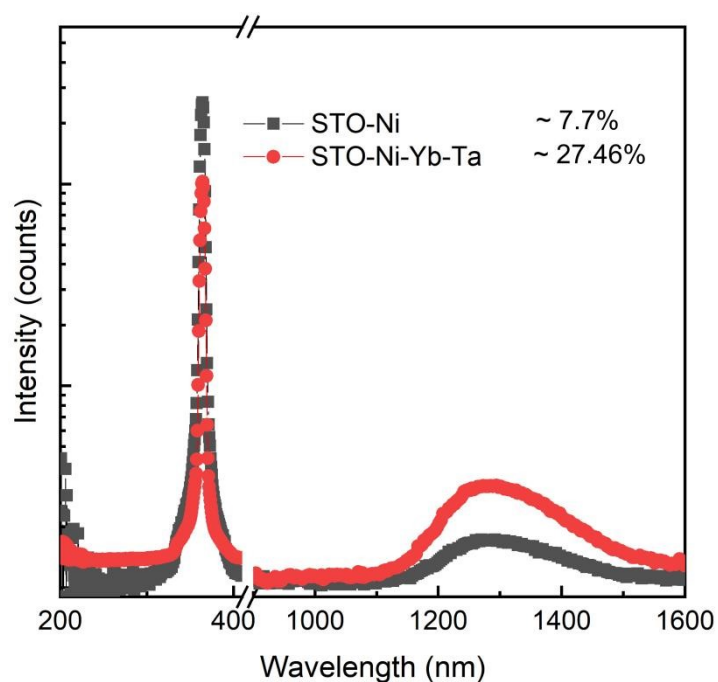

**Figure S5.** Measured PLQY profiles of STO-Ni and STO-Ni-Yb-Ta phosphors, respectively.

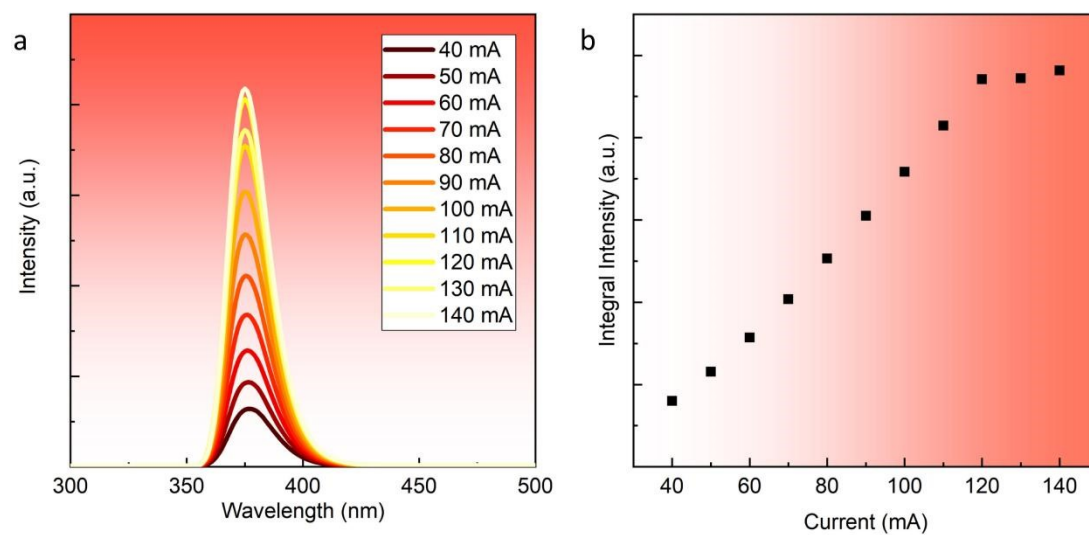

**Figure S6.** (a) Emission profiles and (b) integral intensities of UV LED chip only as a function of input-current power.

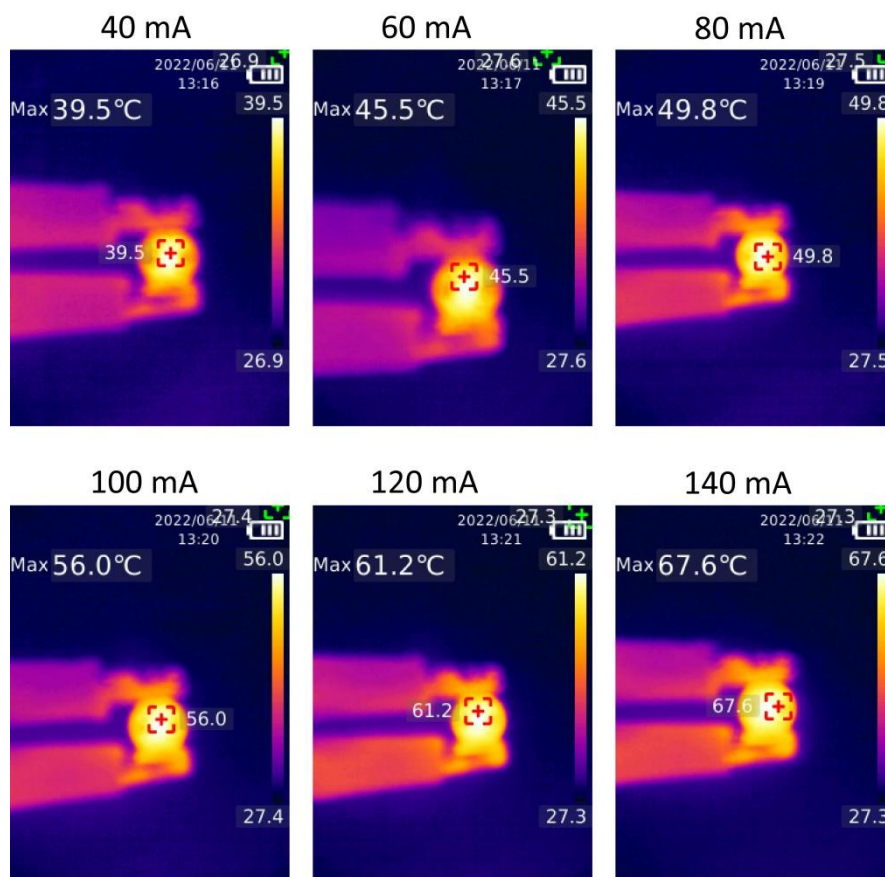

**Figure S7.** Thermography images recorded from the UV chip at different driven current.
